# Supplementary material for: Deciphering the Host–Pathogen Interactome of the Wheat–Common Bunt System: A Step towards Enhanced Resilience in Next Generation Wheat
Source: MDPI journal article supplement (doi:10.3390/ijms23052589), 2022-02-26
Supplement: s1 [file s1]

## **Supplementary Material**

### ***Deciphering the Host-Pathogen Interactome of Wheat-Common bunt system: A Step towards Enhanced Resilience in Next Generation Wheat***

There are 7 Excel files that contain the supplementary material. Due to file size limitations on the “*International Journal of Molecular Sciences*” manuscript submission website, all those 7 excel files are available for access at [http://biocluster.usu.edu/publications/rkataria/wheat\\_PPIs/Supplementary\\_Material](http://biocluster.usu.edu/publications/rkataria/wheat_PPIs/Supplementary_Material).

Thank you.
